# Supplementary material
Source: MDPI journal article supplement (https://www.mdpi.com/2571-5135/7/4/32)
Supplement: s1 [file s1]

**Supplementary Material 4, Table S5: List of PCR Primers for Real-Time PCR used in Study**

| Primer/probe (5' fluorophor; 3' quencher) | Target      | Organism                                         | Sequence (5'→3')                      |
|-------------------------------------------|-------------|--------------------------------------------------|---------------------------------------|
| Forward                                   | <i>ctrA</i> | <i>N.meningitidis</i>                            | GCTGCGGTAGGTGGTTCAA                   |
| Reverse                                   |             |                                                  | TTGTCGCGGATTTGCAACTA                  |
| Probe (5'FAM; 3'TAMRA)                    |             |                                                  | CATTGCCACGTGTCAGCTGCACAT              |
| Forward                                   | <i>femA</i> | <i>S.epidermidis</i>                             | CAACTCGATGCAAATCAGCAA                 |
| Reverse                                   |             |                                                  | GAACCGCATAGCTCCCTGC                   |
| Probe (5'CY5; 3'BHQ)                      |             |                                                  | TGAAGCTAAAACTTAAAAACAAGAACATGGCAATGA  |
| Forward                                   | <i>ply</i>  | <i>Str.pneumoniae</i>                            | TGCAGAGCGTCCTTTGGTCTAT                |
| Reverse                                   |             |                                                  | CTCTTACTCGTGGTTTCCAACCTTGA            |
| Probe (5'CY5; 3'BHQ)                      |             |                                                  | TGGCGCCCATAAGCAAACTCGAA               |
| Forward                                   | <i>hel</i>  | <i>H. influenzae</i>                             | CCGGGTGCGGTAGAATTTAATAA               |
| Reverse                                   |             |                                                  | CTGATTTTTTCAGTGCTGTCTTTGC             |
| Probe (5'CY5; 3'BHQ)                      |             |                                                  | ACAGCCACAACGGTAAAGTGTTCTACG           |
| Forward                                   | <i>sip</i>  | <i>Str.agalactiae</i><br>(group B streptococcus) | ATCCTGAGACAACACTGACA                  |
| Reverse                                   |             |                                                  | TTGCTGGTGTTTCTATTTTCA                 |
| Probe (5'FAM; 3'BHQ)                      |             |                                                  | ATCAGAAGAGTCATACTGCCACTTC             |
| Forward                                   | <i>femB</i> | <i>S.aureus</i>                                  | GACATTTGATAGTCAACGTAAACGTAATATT       |
| Reverse                                   |             |                                                  | GCTCTTCAGTTTCACGATATAAATCTAAGA        |
| Probe (5'HEX; 3'TAMRA)                    |             |                                                  | TCATCACGTTCAAGGAATCTGACTTTAACACCATAGT |
| Forward                                   | <i>hly</i>  | <i>L.monocytogenes</i>                           | CATGGCACCACCAGCATCT                   |
| Reverse                                   |             |                                                  | ATCCGCGTGTTTCTTTTCGA                  |
| Probe (5'FAM; 3'TAMRA)                    |             |                                                  | CGCCTGCAAGTCCTAAGACGCCA               |
