# Supplementary material
Source: MDPI journal article supplement (https://www.mdpi.com/2571-5135/7/4/32)
Supplement: s1 [file s1]

**Supplementary Material S3, Table S4: List of PCR Primers for Target Amplification used in Study**

| Primer            | Target Probe | Organism                          | Gene               | Sequence                    |
|-------------------|--------------|-----------------------------------|--------------------|-----------------------------|
| PrimerHi_HAI1_R   | HAI1         | <i>Haemophilus influenzae</i>     | <i>nucA</i>        | TGAAAATTACCTGCGTTCAT        |
| PrimerHi_HAI1_F   | HAI1         | <i>Haemophilus influenzae</i>     | <i>nucA</i>        | AGCTGTGGAATTAAGTATTTT       |
| PrimerHi_HAI2_R   | HAI2         | <i>Haemophilus influenzae</i>     | <i>nucA</i>        | CATCATTTCCGTATAAATAATG      |
| PrimerHi_HAI2_F   | HAI2         | <i>Haemophilus influenzae</i>     | <i>nucA</i>        | CCTGATAAAAAGTTCAATTTTG      |
| PrimerHi_HAI3_R   | HAI3         | <i>Haemophilus influenzae</i>     | <i>nucA</i>        | ACGAACCTTCCATTTTATAG        |
| PrimerHi_HAI3_F   | HAI3         | <i>Haemophilus influenzae</i>     | <i>nucA</i>        | AATAAAGCAGGATCTAATCC        |
| PrimerHi_HAI4_R   | HAI4         | <i>Haemophilus influenzae</i>     | <i>nucA</i>        | ATTTGTTCCGACAAGATAAC        |
| PrimerHi_HAI4_F   | HAI4         | <i>Haemophilus influenzae</i>     | <i>nucA</i>        | ACCTTTAACGATGCTTATAC        |
| PrimerHi_HAI5_7_R | HAI5         | <i>Haemophilus influenzae</i>     | <i>cpdB</i>        | TTCCGCACTTATAACTTTGA        |
| PrimerHi_HAI5_7_F | HAI5         | <i>Haemophilus influenzae</i>     | <i>cpdB</i>        | TTCTCACTGGTTGCTTTAAT        |
| PrimerHi_HAI6_R   | HAI6         | <i>Haemophilus influenzae</i>     | <i>cpdB</i>        | AAAGCAGAATTTTTGATTGC        |
| PrimerHi_HAI6_F   | HAI6         | <i>Haemophilus influenzae</i>     | <i>cpdB</i>        | TTCATTGGGTATTGTGCTTT        |
| LiMo2_3_R         | LiMo2        | <i>Listeria monocytogenes</i>     | <i>dltA</i>        | ACCCAAGTGAAAGTAACTCGAGAG AT |
| LiMo2_3_F         | LiMo2        | <i>Listeria monocytogenes</i>     | <i>dltA</i>        | CCTGTGCGATAGGCTTGATAACCT    |
| LiMo4_6_R         | LiMo4        | <i>Listeria monocytogenes</i>     | <i>hlyAB</i>       | TTGCCGAAAAATCTGGAAGGTCTTGT  |
| LiMo4_6_F         | LiMo4        | <i>Listeria monocytogenes</i>     | <i>hlyAB</i>       | CAACCAGATGTTCTCCCTGTAAAACG  |
| Neiss1_2_R        | Neiss1/2     | <i>Neisseria spp.</i>             | <b>16S rRNA</b>    | CGCCCAGTAATTCCG ATTAACGCT   |
| Neiss1_2_F        | Neiss1/2     | <i>Neisseria spp.</i>             | <b>16S rRNA</b>    | CCGCATACGCTTTGAGAAGGAAAG C  |
| NsMA4_R           | NsMA4        | <i>Neisseria spp.</i>             | <b>type IV PRP</b> | ACGCTGTTTCATCCATACCGACAAAG  |
| NsMA4_F           | NsMA4        | <i>Neisseria spp.</i>             | <b>type IV PRP</b> | CCCCTGGACGATAATCAGACCAT     |
| NsMA7_8_R         | NsMA7        | <i>Neisseria meningitidis</i> A   | <i>sacB</i>        | ATGGTGCAAGCTGGTTTCAATAGCA   |
| NsMA7_8_F         | NsMA7        | <i>Neisseria meningitidis</i> A   | <i>sacB</i>        | GGGTCAACTCAGAAGATAAGAATTGG  |
| NsMa9_R           | NsMa9        | <i>Neisseria meningitidis</i> A   | <i>sacB</i>        | GTGCTGAGTTTCATGTCAACATGAGC  |
| NsMa9_F           | NsMa9        | <i>Neisseria meningitidis</i> A   | <i>sacB</i>        | AGCTCAATCAAATATTTCTTCAACCT  |
| NsMC1_R           | NsMCD1       | <i>Neisseria meningitidis</i> C/D | <i>SiaD/SynC</i>   | TGTGCAGGTTGGATAGTTTGTAGAAG  |
| NsMC1_F           | NsMCD1       | <i>Neisseria meningitidis</i> C/D | <i>SiaD/SynC</i>   | ACCACACAAAATATGAAAATGCCGAA  |

|              |           |                                   |                         |                              |
|--------------|-----------|-----------------------------------|-------------------------|------------------------------|
| NsMC2_R      | NsMCD2    | <i>Neisseria meningitidis</i> C/D | <b><i>SiaD/SynC</i></b> | CTGCTTAAC TTTATTAAGGGCATTGT  |
| NsMC2_F      | NsMCD2    | <i>Neisseria meningitidis</i> C/D | <b><i>SiaD/SynC</i></b> | AGCCCAACAAGAGAACACCGC        |
| NsMC4_5_R    | NsMCD4/5  | <i>Neisseria meningitidis</i> C/D | <b><i>SiaD/SynC</i></b> | ATCACTACTAGACGGGGATTAATTGT   |
| NsMC4_5_F    | NsMCD4/5  | <i>Neisseria meningitidis</i> C/D | <b><i>SiaD/SynC</i></b> | CAACCTATGCCCCACTCTTAGAATCA   |
| NsMW1_F      | NsMW1-4   | <i>Neisseria meningitidis</i> W   | <b><i>synG</i></b>      | AGGTGAATCTTCCGAGCAGGAAATT    |
| NsMW1_R      | NsMW1-4   | <i>Neisseria meningitidis</i> W   | <b><i>synG</i></b>      | AAGCTGCGCGGAAGAATAGTGA       |
| NsMX1_4_F    | NsMX1-4   | <i>Neisseria meningitidis</i> X   | <b><i>xcbA/B</i></b>    | GCAAAGCAAAAACTTCGTACACTGA    |
| NsMX1_4_R    | NsMX1-4   | <i>Neisseria meningitidis</i> X   | <b><i>xcbA/B</i></b>    | GGGCAACAATACCAATAAACGGTTG    |
| NsMX2_F      | NsMX2     | <i>Neisseria meningitidis</i> X   | <b><i>xcbB</i></b>      | ACAAATGCGACATCCAGCCTGA       |
| NsMX2_R      | NsMX2     | <i>Neisseria meningitidis</i> X   | <b><i>xcbB</i></b>      | AGTATTGCCGCGTAGATGATTAACAA   |
| NsMX5_F      | NsMX5     | <i>Neisseria meningitidis</i> X   | <b><i>xcbB</i></b>      | ACGCAGCTTGGTCAAAAACGTCTA     |
| NsMX5_R      | NsMX5     | <i>Neisseria meningitidis</i> X   | <b><i>xcbB</i></b>      | GCGCCACCTTTACTGCCTCCAT       |
| NsMY1_5_F    | NsMY1-5   | <i>Neisseria meningitidis</i> Y   | <b><i>synF</i></b>      | GGTGAATCTTCCGAGCAGGAAATTTA   |
| NsMY1_5_R    | NsMY1-5   | <i>Neisseria meningitidis</i> Y   | <b><i>synF</i></b>      | AGCTGCGCGGAAGAATAGTGAAA      |
| SaGAL1_2_3_F | SaGAL1-3  | <i>Streptococcus agalactiae</i>   | <b><i>pcsB</i></b>      | ATCGTGTTGTTGCTATTTCGTGAGGT   |
| SaGAL1_2_3_R | SaGAL1-3  | <i>Streptococcus agalactiae</i>   | <b><i>pcsB</i></b>      | GCAACAGTAGTTGCCGAAGAAGTAGC   |
| SaGAL4_F     | SaGAL4    | <i>Streptococcus agalactiae</i>   | <b><i>pcsB</i></b>      | CGTGCAGCTGGTTATTCTGTAGGAAC   |
| SaGAL4_R     | SaGAL4    | <i>Streptococcus agalactiae</i>   | <b><i>pcsB</i></b>      | AGCACTAGGGTTAAATGAACCACGG    |
| SaGAL5_7_F   | SaGAL5&7  | <i>Streptococcus agalactiae</i>   | <b><i>sip</i></b>       | AGCTTCTGTTGCCGCTGAAACAC      |
| SaGAL5_7_R   | SaGAL5&7  | <i>Streptococcus agalactiae</i>   | <b><i>sip</i></b>       | GGAGCCTTGCAATTTTCAGGATGTG    |
| SaGAL6_8_F   | SaGAL6&8  | <i>Streptococcus agalactiae</i>   | <b><i>sip</i></b>       | ACCAATCAAGTTTCTGTTGCAGACCA   |
| SaGAL6_8_R   | SaGAL6&8  | <i>Streptococcus agalactiae</i>   | <b><i>sip</i></b>       | GGAGCTGGTGATACCTGTTCATTAGC   |
| Strep1_3_F   | Strep1-3  | <i>Streptococcus</i> spp.         | <b><i>16S rRNA</i></b>  | CCATTGCCGAAGATTCCCTACT       |
| Strep1_3_R   | Strep1-3  | <i>Streptococcus</i> spp.         | <b><i>16S rRNA</i></b>  | TGGAAACGATAGCTAATACCGCATAA   |
| SPne1_F      | SPne1     | <i>Streptococcus pneumoniae</i>   | <b><i>ply</i></b>       | CAGCTACCCGATGAGTTTGTGTTGTTAT |
| SPne1_R      | SPne1     | <i>Streptococcus pneumoniae</i>   | <b><i>ply</i></b>       | GCTGGGGTCTTCCAATTGGAGA       |
| SPne10_11_F  | SPne10-11 | <i>Streptococcus pneumoniae</i>   | <b><i>sulB</i></b>      | CAAGGGCTCGACTATTGCTTTTTTTGA  |
| SPne10_11_R  | SPne10-11 | <i>Streptococcus pneumoniae</i>   | <b><i>sulB</i></b>      | AAGTCCACCCATGCCAACTTCC       |
| SPne12_F     | SPne12    | <i>Streptococcus pneumoniae</i>   | <b><i>sulB</i></b>      | CTCCAGAAGCCTTGCTGTGATTGA     |

|                 |               |                                 |                       |                             |
|-----------------|---------------|---------------------------------|-----------------------|-----------------------------|
| SPne12_R        | SPne12        | <i>Streptococcus pneumoniae</i> | <b><i>sulB</i></b>    | AGGCTAGTCTGGAAGCGACCT       |
| SPne2_F         | SPne2         | <i>Streptococcus pneumoniae</i> | <b><i>ply</i></b>     | ACTCTGTCCATTTCAGGCGAAAAGC   |
| SPne2_R         | SPne2         | <i>Streptococcus pneumoniae</i> | <b><i>ply</i></b>     | AGCCTCTACTTCATCACTCTTACTCG  |
| SPne3_4_5_F     | SPne3-5       | <i>Streptococcus pneumoniae</i> | <b><i>dexB</i></b>    | CCGATTGAAGAAATCATGGACAGTAT  |
| SPne3_4_5_R     | SPne3-5       | <i>Streptococcus pneumoniae</i> | <b><i>dexB</i></b>    | GCCGCAGTGTTTTCAATCAAGACAGA  |
| SPne6_F         | SPne6         | <i>Streptococcus pneumoniae</i> | <b><i>dexB</i></b>    | CGATTGCGGCTATTTTTGGAACCAT   |
| SPne6_R         | SPne6         | <i>Streptococcus pneumoniae</i> | <b><i>dexB</i></b>    | GTTTCATCGCGCCAGATATAGTAGTCT |
| SPne7_F         | SPne7         | <i>Streptococcus pneumoniae</i> | <b><i>cap</i></b>     | CCGATGGAAGAAATCATGGACAGTAT  |
| SPne7_R         | SPne7         | <i>Streptococcus pneumoniae</i> | <b><i>cap</i></b>     | CCAGCGCTTCTTGAACGTTGATTTC   |
| SPne9_F         | SPne9         | <i>Streptococcus pneumoniae</i> | <b><i>sulB</i></b>    | GAAAGAAATTGAAAACAATCAATGGA  |
| SPne9_R         | SPne9         | <i>Streptococcus pneumoniae</i> | <b><i>sulB</i></b>    | GTAATGAATGAGATAGGGCGAGC     |
| StAU1_2_3-F     | StAU1-3       | <i>Staphylococcus aureus</i>    | <b>NWMN_2357</b>      | GCGCCATAACTCATACCAGATTGTCC  |
| StAU1_2_3-R     | StAU1-3       | <i>Staphylococcus aureus</i>    | <b>NWMN_2357</b>      | ATTTTCTGGGGATAATGAAGGGAAAC  |
| StAU11_femA-F   | StAU11        | <i>Staphylococcus aureus</i>    | <b><i>femA</i></b>    | CAAGAACATGGCAATGAATTACCCAT  |
| StAU11_femA-R   | StAU11        | <i>Staphylococcus aureus</i>    | <b><i>femA</i></b>    | AACTTAACTACGCCAGCATCTTCAG   |
| StAU3_Spa-F     | StAU3         | <i>Staphylococcus aureus</i>    | <b><i>Spa</i></b>     | GGCAAAGAAGATGGCAACAAACCTG   |
| StAU3_Spa-R     | StAU3         | <i>Staphylococcus aureus</i>    | <b><i>Spa</i></b>     | CCGTTGCCGTCTTCTTTACCAGG     |
| StAU4-F         | StAU4         | <i>Staphylococcus aureus</i>    | <b>NWMN_1707/1708</b> | TGCTCCTTTTTTTATATTGTAAACG   |
| StAU4-R         | StAU4         | <i>Staphylococcus aureus</i>    | <b>NWMN_1707/1708</b> | ACTGACATGTTGATGCATGTCTT     |
| StAU5-F         | StAU5         | <i>Staphylococcus aureus</i>    | <b><i>SplB</i></b>    | CACGCTCTTCAACTTGAATGACTGAT  |
| StAU5-R         | StAU5         | <i>Staphylococcus aureus</i>    | <b><i>SplB</i></b>    | CATCAAGAGTTTAGCAGCATTAAACAA |
| StAU6-F         | StAU6         | <i>Staphylococcus aureus</i>    | <b><i>SplF</i></b>    | ACTTATCACATGAAAGTCGGTGATGA  |
| StAU6-R         | StAU6         | <i>Staphylococcus aureus</i>    | <b><i>SplF</i></b>    | ACAACCGCATCAGATGTCACTATAT   |
| StAU7_8-F       | StAU7&8       | <i>Staphylococcus aureus</i>    | <b><i>SplC</i></b>    | ATGGCGTCTACTTTACACCAGAAAT   |
| StAU7_8-R       | StAU7&8       | <i>Staphylococcus aureus</i>    | <b><i>SplC</i></b>    | CTGTCGCATCTTTAAATGAAACGAC   |
| StAU9_mecA-F    | StAU9         | <i>Staphylococcus aureus</i>    | <b><i>mecA</i></b>    | CAAACCTACGGTAACATTGATCGCAAC |
| StAU9_mecA-R    | StAU9         | <i>Staphylococcus aureus</i>    | <b><i>mecA</i></b>    | TTGGAACGATGCCTATCTCATATGC   |
| StAUA1_2_B1_2-F | StAUA1&2/B1&2 | <i>Staphylococcus aureus</i>    | <b><i>spa</i></b>     | CACGATGAAGCTCAACAAAATGCTTT  |
| StAUA1_2_B1_2-R | StAUA1&2/B1&2 | <i>Staphylococcus aureus</i>    | <b><i>spa</i></b>     | AGGCATGTTCAAGATTTTCATAGAAGG |

|                    |               |                                   |                 |                            |
|--------------------|---------------|-----------------------------------|-----------------|----------------------------|
| StAUA1_2B1_2_Spa-F | StAUA1&2/B1&2 | <i>Staphylococcus aureus</i>      | <i>spa</i>      | GTGGCGTAACACCTGCTGCAA      |
| StAUA1_2B1_2_Spa-R | StAUA1&2/B1&2 | <i>Staphylococcus aureus</i>      | <i>spa</i>      | ACCAGGCTTGTTGTTGTCTTCTTGC  |
| StAUA10_femBb-F    | StAUA10       | <i>Staphylococcus aureus</i>      | <i>spa</i>      | CTGAGTATGATACATCGAGCCAAG   |
| StAUA10_femBb-R    | StAUA10       | <i>Staphylococcus aureus</i>      | <i>spa</i>      | ATACAAATCCAGCACGCTCTTC     |
| StAUA10_femB-F     | StAUA10       | <i>Staphylococcus aureus</i>      | <i>spa</i>      | ACTGAGTATGATACATCGAGCCAAG  |
| StAUA10_femB-R     | StAUA10       | <i>Staphylococcus aureus</i>      | <i>spa</i>      | ACAAATCCAGCACGCTCTTCAGT    |
| StAUA3_4_B4b-F     | StAUA3        | <i>Staphylococcus aureus</i>      | <i>spa</i>      | GTTGTCTTCCTCTTTTGGTGCTT    |
| StAUA3_4_B4b-R     | StAUA3        | <i>Staphylococcus aureus</i>      | <i>spa</i>      | AAACGAAGAACAACGCAATGGT     |
| StAUA3_4_B4-F      | StAUA3        | <i>Staphylococcus aureus</i>      | <i>spa</i>      | CGAAGAACAACGCAATGGTTTCATCC |
| StAUA3_4_B4-R      | StAUA3        | <i>Staphylococcus aureus</i>      | <i>spa</i>      | GTTGTCTTCCTCTTTTGGTGCTTGAG |
| TB ESAT6 1-F       | TB ESAT6      | <i>Mycobacterium tuberculosis</i> | <b>ESAT6</b>    | ATGACAGAGCAGCAGTGGAATTT    |
| TB ESAT6 1-R       | TB ESAT6      | <i>Mycobacterium tuberculosis</i> | <b>ESAT6</b>    | ATGCGAACATCCCAGTGACGTTG    |
| MTB1_2b-F          | MTB1&2        | <i>Mycobacterium tuberculosis</i> | <b>IS6110</b>   | GAGGAGGTACCCGCCGGAGCTG     |
| MTB1_2b-R          | MTB1&2        | <i>Mycobacterium tuberculosis</i> | <b>IS6110</b>   | TTAGCGTGCTGGCCGGTCGA       |
| MTB1_2-F           | MTB1&2        | <i>Mycobacterium tuberculosis</i> | <b>IS6110</b>   | ATGTCAGGTGGTTCATCGAGGA     |
| MTB1_2-R           | MTB1&2        | <i>Mycobacterium tuberculosis</i> | <b>IS6110</b>   | TTAGCGTGCTGGCCGGTC         |
| MTB3_4-F           | MTB3&4        | <i>Mycobacterium tuberculosis</i> | <b>16S rRNA</b> | GTTCCGCTTCGTTGAAGAGATGATCC |
| MTB3_4-R           | MTB3&4        | <i>Mycobacterium tuberculosis</i> | <b>16S rRNA</b> | CGCCTAACAGCATACCCGTTTCG    |
| B2M1-F             | B2M1          | <i>Homo sapiens</i>               | <b>B2M</b>      | CTACTTTGAGTGCTGTCTCCATGTT  |
| B2M1-R             | B2M1          | <i>Homo sapiens</i>               | <b>B2M</b>      | AGCTTTGAGTGCAAGAGATTGAAGAG |
| G6PD-F             | G6PD1         | <i>Homo sapiens</i>               | <b>G6PD</b>     | GTCCCACCAACTCTGCACTCCA     |
| G6PD-R             | G6PD1         | <i>Homo sapiens</i>               | <b>G6PD</b>     | TTTTTTGGCTGTTTGCGGATTTAATG |
| PGK-F              | PGK1          | <i>Homo sapiens</i>               | <b>PGK</b>      | CAGCAGCAGTGGAGAGATGGG      |
| PGK-R              | PGK1          | <i>Homo sapiens</i>               | <b>PGK</b>      | GGAACAGAGCCTTCCTCCATGGTA   |
| APRR5A-F           | APRR5A        | <i>Arabidopsis thaliana</i>       | <b>APRR5</b>    | AGGAGCCATTGCAGATGTATAAGC   |
| APRR5A-R           | APRR5A        | <i>Arabidopsis thaliana</i>       | <b>APRR5</b>    | AAGCCAACAGCAATGCACCATCAG   |
