# Supplementary material
Source: MDPI journal article supplement (https://www.mdpi.com/2571-5135/7/4/32)
Supplement: s1 [file s1]

**Supplementary Material S1 - Table S1**

| <b>Bacterial Species</b>          | <b>Serogroup/ Strain</b>   | <b>Source</b>                                 |
|-----------------------------------|----------------------------|-----------------------------------------------|
| <i>Haemophilus influenzae</i>     | HPA                        | Dr Nigel Silman, HPA, Porton Down, Salisbury  |
| <i>Haemophilus influenzae</i>     | Clinical isolate Hi2       | Dr. S. Green & Dr. P. Marsh, HPA, Southampton |
| <i>Listeria monocytogenes</i>     | Clinical isolate Lm1       | Dr. S. Green & Dr. P. Marsh, HPA, Southampton |
| <i>Neisseria flavescens</i>       | Not typed                  | Prof. A. Gorringe                             |
| <i>Neisseria lactamica</i>        | 020-2006                   | Prof. A. Gorringe                             |
| <i>Neisseria lactamica</i>        | Y92-1009                   | Prof. A. Gorringe                             |
| <i>Neisseria lactamica</i>        | HPA1                       | Prof. A. Gorringe                             |
| <i>Neisseria meningitidis</i>     | Z5005 (B40) Serogroup A    | Prof. A. Gorringe                             |
| <i>Neisseria meningitidis</i>     | Z4673 (B2198) Serogroup B  | Prof. A. Gorringe                             |
| <i>Neisseria meningitidis</i>     | Z8948 (FAM18) Serogroup C  | Prof. A. Gorringe                             |
| <i>Neisseria meningitidis</i>     | Z6904 (ROY) Serogroup W135 | Prof. A. Gorringe                             |
| <i>Neisseria meningitidis</i>     | D/ NCTC9714                | NCTC, Colindale London                        |
| <i>Neisseria meningitidis</i>     | X/ NCTC10790               | NCTC, Colindale London                        |
| <i>Neisseria meningitidis</i>     | Y/ NCTC10791               | NCTC, Colindale London                        |
| <i>Neisseria meningitidis</i>     | Z/ NCTC10792               | NCTC, Colindale London                        |
| <i>Neisseria meningitidis</i>     | Z-prime/ NCTC10793         | NCTC, Colindale London                        |
| <i>Neisseria meningitidis</i>     | 73-M6/ NCTC11423           | NCTC, Colindale London                        |
| <i>Neisseria meningitidis</i>     | 74-M24/ NCTC11424          | NCTC, Colindale London                        |
| <i>Neisseria meningitidis</i>     | NCTC13152                  | NCTC, Colindale London                        |
| <i>Neisseria meningitidis</i>     | NCTC13198                  | NCTC, Colindale London                        |
| <i>Neisseria meningitidis</i>     | NCTC13214                  | NCTC, Colindale London                        |
| <i>Neisseria meningitidis</i>     | NCTC13218                  | NCTC, Colindale London                        |
| <i>Neisseria meningitidis</i>     | NCTC13223                  | NCTC, Colindale London                        |
| <i>Neisseria meningitidis</i>     | NCTC13248                  | NCTC, Colindale London                        |
| <i>Neisseria meningitidis</i>     | NCTC13273                  | NCTC, Colindale London                        |
| <i>Neisseria meningitidis</i>     | NCTC13275                  | NCTC, Colindale London                        |
| <i>Neisseria meningitidis</i>     | NCTC13225                  | NCTC, Colindale London                        |
| <i>Staphylococcus aureus</i> MRSA | EMRSA-16                   | Dr. S. Green & Dr. P. Marsh, HPA, Southampton |
| <i>Staphylococcus aureus</i> MSSA | ATCC29213                  | Dr. S. Green & Dr. P. Marsh, HPA, Southampton |
| <i>Streptococcus agalactiae</i>   | Clinical isolate Sa1       | Dr. S. Green & Dr. P. Marsh, HPA, Southampton |
| <i>Streptococcus pneumoniae</i>   | NCTC07465                  | Dr. S. Green & Dr. P. Marsh, HPA, Southampton |
