# Supplementary material
Source: MDPI journal article supplement (https://www.mdpi.com/2571-5135/7/4/32)
Supplement: s1 [file s1]

**Supplementary Material S2, Table S2: Microarray Oligonucleotide Probes used in Study**

| Probe         | Organism                        | Gene               | Sequence                                                                 |
|---------------|---------------------------------|--------------------|--------------------------------------------------------------------------|
| HAI1          | <i>Haemophilus influenzae</i>   | <i>nucA</i>        | TAAATGGTCAGCAAACCAAAGTGGATATTGGTGGTTTTTCTGCTGTCAATGCAAAACTTAACAAATTGCG   |
| HAI2          | <i>Haemophilus influenzae</i>   | <i>nucA</i>        | GCACAAATTATGGCAAATGCGCTAAAACAGCAAGGAATTAATAAAATTATCCTACTTTCACACGCAGGTA   |
| HAI3          | <i>Haemophilus influenzae</i>   | <i>nucA</i>        | TTTATTGCAGAAACAATGTATAACGAACTCAAAACAGTGGATTAACTATTCAAAATGCTGGCGGTGTAC    |
| HAI4          | <i>Haemophilus influenzae</i>   | <i>nucA</i>        | GAAACACCAAATGCGGAAGGTAAGCGTTTAGTGAGTGTTGAAGTCTTGAATAAACAAACCCAACAATGGG   |
| HAI5          | <i>Haemophilus influenzae</i>   | <i>cpdB</i>        | TTGATTGCAACGAATAACTATCGTGCTTACGGCAATAAATTCCCAGGTACTGGTGATAAACATATTGTTT   |
| HAI6          | <i>Haemophilus influenzae</i>   | <i>cpdB</i>        | ATCCAAATGCGGATAAAAACCTGGCGTTTTGTGCCTATCACAGGTAACGATAAATTAGATGTCCGTTTTGA  |
| HAI7          | <i>Haemophilus influenzae</i>   | <i>cpdB</i>        | ATTAACCCAGAATCGCATCGTGTAGTGAATCTCACTTATCAAGGCAAACCAGTTGATCCAAAAGCAGAAT   |
| HAIB1         | <i>Haemophilus influenzae</i>   | <i>bexA</i>        | TCGGGATTTTAGGGCGAAATGGTGCTGGTAAATCCACGCTCATTCGTTTGATGAGTGGTGTTGAGCCTCC   |
| HAIB2         | <i>Haemophilus influenzae</i>   | <i>bexA</i>        | AATTGATGAGGTGATTGCAGTAGGGGATTCGCGCTTGCAGAAAAATGTAAGTATGAGTTATTTGAGAAA    |
| HAIF1         | <i>Haemophilus influenzae</i>   | <i>bexA</i>        | TTGGGATCCTAGGACGAAATGGAGCAGGCAAATCAACACTTATTCGGTTGATCAGTGGAGTAGAACCCCC   |
| HAIF2         | <i>Haemophilus influenzae</i>   | <i>bexA</i>        | GATCGATGAAGTAATAGCGGTGGGAGATTCTCGGTTTGCAGAGAAATGCAAATATGAATTATTTGAAAAG   |
| LiMo1         | <i>Listeria monocytogenes</i>   | <i>dltA</i>        | ATATGTCTCCCCTAATGTTAGTTGCATTCTTAGGCTCTATCAAATCAGGTCGAGCTTATGTACCAGTAGA   |
| LiMo2         | <i>Listeria monocytogenes</i>   | <i>dltA</i>        | AAGCTTACCACCTTGGCGTTATTAACACAGATATGCGTTTACACATCGTTGACCAAGAAACTGGTGAGGTT  |
| LiMo3         | <i>Listeria monocytogenes</i>   | <i>dltA</i>        | ATATGCGTTTACACATCGTTGACCAAGAAACTGGTGAGGTTCTTCCAGAAGGCGAAAAAGGAGAAATTGT   |
| LiMo4         | <i>Listeria monocytogenes</i>   | <i>hly</i>         | TGTAAATAATAGCTTGAATGTAAACTTCGGCGCAATCAGTGAAGGGAAAATGCAAGAAGAAGTCATTAGT   |
| LiMo5         | <i>Listeria monocytogenes</i>   | <i>hly</i>         | AGTCCTAAGACGCCAATCGAAAAGAAACACGCGGATGAAATCGATAAGTATATACAAGGATTGGATTACA   |
| LiMo6         | <i>Listeria monocytogenes</i>   | <i>hly</i>         | AATACATTAGTGGAAGATGGAATGAAAAATATGCTCAAGCTTATCCAAATGTAAGTGCAAAAATTGATT    |
| Neiss 1       | <i>Neisseria</i> spp.           | <b>16S rRNA</b>    | TTGCGTTATTTCGAGCGGCCGATATCTGATTAGCTAGTTGGTGGGGTAA                        |
| Neiss 2       | <i>Neisseria</i> spp.           | <b>16S rRNA</b>    | TGCTAATACCCGCGGCTGATGACGGTACCTGAAGAATAAGCACCGGCTAA                       |
| NsG1          | <i>Neisseria gonorrhoeae</i>    | <b>type IV PRP</b> | TATAGTGTTCGGTGCAGTTTGTCTGATGCGGAAAAACCAAGGGCATAACAGGTTGGTCCGTGTTCCGAACG  |
| NsMA1         | <i>Neisseria meningitidis</i> A | <i>ctrA</i>        | AAGTTAAAGTTTTGTATTGTAATTCTTTTTTAATTTTGGGAAGTGCATGTAGTGCTATTCCCTCCTCTG    |
| NsMA2         | <i>Neisseria meningitidis</i> A | <i>sacB</i>        | CAAAGAATTTTAAAAATTCATCACATATCCATAAAACTAATATAAGTAAAGCTCAATCAAATATTTCTTC   |
| NsMA3         | <i>Neisseria meningitidis</i> A | <i>sacB</i>        | GCATGGCTAGATTTAAATAACCCTAAAATTCAATGGGTATATCACGAAGAAATTATGCCACAAAGTGCCC   |
| NsMA4         | <i>Neisseria meningitidis</i> A | <b>type IV PRP</b> | TATAATGTTTCGGTGCATTTTGTCAATGAGGAAAAACCAAGGGCATAACAGCTTGGTCCGCGTTCCAAAGA  |
| NsMA5         | <i>Neisseria meningitidis</i> A | <i>ubiA</i>        | AATGCGCAGTGCCGGTTGCGTCATCAACGATTTTGCCGACCGCGATTTTGACGGTGCTGTGAGCGCACC    |
| NsMA6<br>ROSO | <i>Neisseria meningitidis</i> A | <i>sacB</i>        | GACAGATTTATTTAGCATTGCTCATGTTGACATGAAACTCAGCACAGATAGAACTTTAAGTTCATCTATA   |
| NsMA7         | <i>Neisseria meningitidis</i> A | <i>sacB</i>        | CAGTACATCAAGATTCCCTTAGTAGAGATGAATTAATAATTCGCATTACGCTCTTGGGAAATGAGTGGATCC |
| NsMA8         | <i>Neisseria meningitidis</i> A | <i>sacB</i>        | GATTCCTTAGTAGAGATGAATTAATAATTCGCATTACGCTCTTGGGAAATGAGTGGATCCTTCATTGAAA   |
| NsMA9         | <i>Neisseria meningitidis</i> A | <i>sacB</i>        | ACGCAATAGGTGTATATATTCTTCCTTCTAATCTTACTCTTAAGCCTGCATTATGTATTCTAGAATCACA   |

|        |                                   |                    |                                                                         |
|--------|-----------------------------------|--------------------|-------------------------------------------------------------------------|
| NsMB1  | <i>Neisseria meningitidis</i> B   | <i>SiaD</i>        | TTATCTTACCCCCCACGTAACAATTTATTTGTCATATCTAATTTAGGTCAGCTTAACCAAGTCCAAAGC   |
| NsMB2  | <i>Neisseria meningitidis</i> B   | <i>SiaD</i>        | GAGAGTTAATTATTAACCTTAATTCAAAAATATTCAATGGTGGAAAACACTGAAATGATCCAAGAACACTT |
| NsMB3  | <i>Neisseria meningitidis</i> B   | <b>type IV PRP</b> | TATAGTGTTCGGTAAAGTTTGTGCGATAAGGAAAAATCAAGGGCATACAGGTTGGTCGGCGTTCCGAAGG  |
| NsMB4  | <i>Neisseria meningitidis</i> B   | <i>ubiA</i>        | AATGCGCAGTGCCGGCTGCGTCATCAACGACTTTGCCGACCGCGATTTTGACGGTGCTGTGAGCGGTACA  |
| NsMB5  | <i>Neisseria meningitidis</i> B   | <i>SiaD</i>        | AACATCTCCATTTTATCTTACCCCCCACGTAACAATTTATTTGTCATATCTAATTTAGGTCAGCTTAAC   |
| NsMB6  | <i>Neisseria meningitidis</i> B   | <i>SiaD</i>        | CTAACAAGAATCTATTTGAATCTATTTATCTATTTGAGCTTCCTAGAAGCCCTAATAATATAACTCCTAA  |
| NsMB7  | <i>Neisseria meningitidis</i> B   | <i>SiaD</i>        | CAATCAGCTAACAAGAATCTATTTGAATCTATTTATCTATTTGAGCTTCCTAGAAGCCCTAATAATATAA  |
| NsMCD1 | <i>Neisseria meningitidis</i> C/D | <i>SiaD/SynC</i>   | TTATTATTCTACATTTGCCCACTTAATCAAGCTCATAGTCTGACTAAGATGCAAAAATTAAAAATAAT    |
| NsMCD2 | <i>Neisseria meningitidis</i> C/D | <i>SiaD/SynC</i>   | GGCAAATCGTGATTGATTGATACACCATACAGCCCAACAAGAGAACACCGCTTTAATTGAAGAGCATT    |
| NsMCD3 | <i>Neisseria meningitidis</i> C/D | <i>SiaD/SynC</i>   | AAGATTCCCAGTGTTTGTCAACACCTTTATTTAGCAGCTTCGCACCCAAAAGCAATCTTTTATTATTTTC  |
| NsMCD4 | <i>Neisseria meningitidis</i> C/D | <i>SiaD/SynC</i>   | CTCAAACTATCCAACCTGCACACCTTTATGTTATGTCTTTTGCTGGGCATTATTCCTCTCTGCTCAGCT   |
| NsMCD5 | <i>Neisseria meningitidis</i> C/D | <i>SiaD/SynC</i>   | GGGATTAGCACAAGCCAATCTATTGCTAAAATTCAAGACAAATACCGCATATCTCAAAATGACTATATTT  |
| NsML1  | <i>Neisseria meningitidis</i> L   | <i>lcbA</i>        | GAAATCGAAGAACCGGCCATCATTGCCAATAGCTTGCATTTAGCAGCTGTAGAAAGTGCCATCCATCTTA  |
| NsML2  | <i>Neisseria meningitidis</i> L   | <i>lcbA</i>        | GATGTTTTTGTAGCACGCCCATTCATAGGGAACATTTTTTCCACGCAAACGGAATAGCCTCCCTTTTCA   |
| NsML3  | <i>Neisseria meningitidis</i> L   | <i>lcbA</i>        | GGTGACGCTGTTGCCATTGAGTATCACTATTATCTACCCACGTGAAAACGACATCAATCTTAAATGGGCT  |
| NsML4  | <i>Neisseria meningitidis</i> L   | <i>lcbA</i>        | TCACGTGGGTAGATAATAGTGATACTCAATGGCAACAGCGTCACCAACAATACTGCCATGCAGCCTCGCC  |
| NsML5  | <i>Neisseria meningitidis</i> L   | <i>lcbA</i>        | ACGGGTTTCGTCGTTGCTGTACAGATTGTTAGGCGAGGCTGCATGGCAGTATTGTTGGTGACGCTGTTGC  |
| NsMsp  | <i>Neisseria meningitidis</i>     | <i>CtrA</i>        | TATATTCGTCACGCAGTATTATTATTGTGTGGAAGTTAATTGTAGGATGCTCTGCGATTCTTCATCAG    |
| NsMW1  | <i>Neisseria meningitidis</i> W   | <i>SynG</i>        | TCAGAAAGTGAGGGATTTCATATATATTTATGGAAGGCATGGTGTATGATATTCGAATCGTTGTATATG   |
| NsMW2  | <i>Neisseria meningitidis</i> W   | <i>SynG</i>        | TGGAGCGAATGATTACAGTAACTATAATGAAAATGGTTGTGTTTTTAAACTGGTGATATTTCTGGAATG   |
| NsMW3  | <i>Neisseria meningitidis</i> W   | <i>SynG</i>        | AGAAAGTGAGGGATTTCATATATATTTATGGAAGGCATGGTGTATGATATTCGAATCGTTGTATATGAT   |
| NsMW4  | <i>Neisseria meningitidis</i> W   | <i>SynG</i>        | GACATCAGAAAGTGAGGGATTTCATATATATTTATGGAAGGCATGGTGTATGATATTCGAATCGTTGTA   |
| NsMX1  | <i>Neisseria meningitidis</i> X   | <i>XcbB</i>        | ACAAATAGTCGCTTAAACATTATTAAATTAGCCCGAAGAGATGCCCAAGCTTACGATCAATATATTGAAA  |
| NsMX2  | <i>Neisseria meningitidis</i> X   | <i>XcbB</i>        | ATTATTGACTCATCGGTTTATAATCAAAAAGATGTCCATTTCGTCAAACATTTTAAAGAAGCCAACATGA  |
| NsMX3  | <i>Neisseria meningitidis</i> X   | <i>XcbA/B</i>      | ACTTAGCGGATGTCACCCTCACATCACAGCCTAGTGGACAATAATAATCTAAGTTACGGAGTAATCGTAT  |
| NsMX4  | <i>Neisseria meningitidis</i> X   | <i>XcbB</i>        | ACTGAAGGCTTACAGCGATTTGCGCCGCCATAAAGAAATGTTATACACACTGACACCACCTTCACCAAAA  |
| NsMX5  | <i>Neisseria meningitidis</i> X   | <i>XcbB</i>        | GATTACGAAGACCAGATTTCAGAGCCTGATTAAAGAAACCTTATACAAATGCGACATCCAGCCTGAAAACG |
| NsMY1  | <i>Neisseria meningitidis</i> Y   | <i>SynF</i>        | TCTCAAAGCGAAGGCTTTGGTTATATATTTCTAGAGGGTATGGTGTACGATATCCCTATCCTTGCCTATA  |
| NsMY2  | <i>Neisseria meningitidis</i> Y   | <i>SynF</i>        | TGGAGCGAATGATTTTAGCAATTATAATGAAAACGCTTCAGTTTTTAAACTGGTGATATTTCTGGAATG   |
| NsMY3  | <i>Neisseria meningitidis</i> Y   | <i>SynF</i>        | GACATCTCAAAGCGAAGGCTTTGGTTATATATTTCTAGAGGGTATGGTGTACGATATCCCTATCCTTGCC  |
| NsMY4  | <i>Neisseria meningitidis</i> Y   | <i>SynF</i>        | CAAAGCGAAGGCTTTGGTTATATATTTCTAGAGGGTATGGTGTACGATATCCCTATCCTTGCCTATAATT  |
| NsMY5  | <i>Neisseria meningitidis</i> Y   | <i>SynF</i>        | GAAGGCTTTGGTTATATATTTCTAGAGGGTATGGTGTACGATATCCCTATCCTTGCCTATAATTTTAAAT  |

|         |                                 |                                                 |                                                                         |
|---------|---------------------------------|-------------------------------------------------|-------------------------------------------------------------------------|
| NsMZ1   | <i>Neisseria meningitidis</i> Z | <b><i>CtrA</i></b>                              | ATATCTTCTTTTATGATTTATGCGGTGCTGTTTCGCTATGGTTACGGCATGTAGTGCTATTCCCTCCTCCG |
| SaGAL1  | <i>Streptococcus agalactiae</i> | <b><i>pscB</i></b>                              | AGATGTTAGCACACAAGAGGCTGACAAAGCGGCCTTAGAAGCTAAACAAATTGAAAATCAAAATGCTAT   |
| SaGAL2  | <i>Streptococcus agalactiae</i> | <b><i>pscB</i></b>                              | ACAAGCAAGCTATCGAAAATAATAAAGCAGCCTTAGCAACACAAAGAGCACAATTAGAAGCAGCTCAATT  |
| SaGAL3  | <i>Streptococcus agalactiae</i> | <b><i>pscB</i></b>                              | GAGTCTGCCACAGCTCCTACTGAAACAGTTCAAACACAACCGAGAACTGAAATAAAGCCTTCTAATCTTA  |
| SaGAL4  | <i>Streptococcus agalactiae</i> | <b><i>pscB</i></b>                              | TTGCAGTAGTAACGTCAGTGGCTAACAATTCATCTATCCAAGTTATGGAATCAAACCTATGCTGGAAATAT |
| SaGAL5  | <i>Streptococcus agalactiae</i> | <b><i>sip</i></b>                               | TAAAGTAGCACCGGTAAGAAGTGTAGCAGCCCCTAGAGTGGCAAGTGTTAAAGTAGTCACTCCTAAAGTA  |
| SaGAL6  | <i>Streptococcus agalactiae</i> | <b><i>sip</i></b>                               | TCTCTCAATACAATTTTCGGAAGGTATGACACCAGAAGCAGCAACAACGATTGTTTCGCCAATGAAGACAT |
| SaGAL7  | <i>Streptococcus agalactiae</i> | <b><i>sip</i></b>                               | TAAGTTACAAGCGACTGAAGTTAAGAGCGTTCCGGTAGCACAAAAAGCTCCAACAGCAACACCGGTAGCA  |
| SaGAL8  | <i>Streptococcus agalactiae</i> | <b><i>sip</i></b>                               | TTCTCTCAATACAATTTTCGGAAGGTATGACACCAGAAGCAGCAACAACGATTGTTTCGCCAATGAAGACA |
| SPne1   | <i>Streptococcus pneumoniae</i> | <b><i>ply</i></b>                               | TGATATTTCTGTAACAGCTACCAACGACAGTCGCCTCTATCCTGGAGCACTTCTCGTAGTGGATGAGACC  |
| SPne2   | <i>Streptococcus pneumoniae</i> | <b><i>ply</i></b>                               | TCCAGGAGATGTGTTTCAAGATACTGTAACGGTAGAGGATTTAAACAGAGAGGAATTTCTGCAGAGCGT   |
| SPne3   | <i>Streptococcus pneumoniae</i> | <b><i>dexB</i></b>                              | TCGAGCTGACTTTGAATTGCTTGATACGGCTGATAAGGTCTTTGCTTATATACGTAAGGATGGCGACCGT  |
| SPne4   | <i>Streptococcus pneumoniae</i> | <b><i>dexB</i></b>                              | ACAATGCCCCGTACCCCTATGCAATGGGACGAGAGCAAAAACGCTGGTTTCTCAACAGGTCAACCTTGGTT |
| SPne5   | <i>Streptococcus pneumoniae</i> | <b><i>dexB</i></b>                              | GAGAGCAAAAACGCTGGTTTCTCAACAGGTCAACCTTGGTTGGCGGTAAATCCAAATTACGAGATGATCA  |
| SPne6   | <i>Streptococcus pneumoniae</i> | <b><i>dexB/</i></b><br><b><i>intergenic</i></b> | TTTAGCTGCTTGCGGCCAATCAGGTTTCAGATACAAAACTTACTCATCAACCTTTAGTGGAATCCAAC    |
| SPne7   | <i>Streptococcus pneumoniae</i> | <b><i>capN-like</i></b><br><b>gene</b>          | CGCCTCTAGCTAATTACAAGGGTAGCCTTTATAATCTACCTTTCAATATGAATACTTTCTATGCTATGTG  |
| SPne8   | <i>Streptococcus pneumoniae</i> | <b><i>aliB-like</i></b><br><b>gene</b>          | TGATTCAAAACTCGATTAAGGGCTTGAATGATTATATTATAGGAGCGGATTCTGACTTTTCTAAGGTTGG  |
| SPne9   | <i>Streptococcus pneumoniae</i> | <b><i>sulB</i></b>                              | CTAACTACCGGACGGATCAACCGCATTTTGGCTTGGAACGAATGGTGGAAGTGTAGCTTTGCGTGCCAA   |
| SPne10  | <i>Streptococcus pneumoniae</i> | <b><i>sulB</i></b>                              | TTTAGCTCGCCCTATCTCATTCAATACACAGACCAGATTAGCATCAATGGGGAATCGATCTCAGAAGCGA  |
| SPne11  | <i>Streptococcus pneumoniae</i> | <b><i>sulB</i></b>                              | ACAACCGAGTTTGAGATTATCACAGCCCTGGCCTATGACTACTTTGCCTCAGAGCAAGTAGATGTGGCCA  |
| SPne12  | <i>Streptococcus pneumoniae</i> | <b><i>sulB</i></b>                              | AAAGATGCGCCGAGACTTGCCTACGGGACAGATTATCAGGTTTCGTCATCAAGAAAGTGTGGTGACAGGGG |
| Strep 1 | <i>Streptococcus</i> spp.       | <b><i>16S rRNA</i></b>                          | GTTAGTTATTTAAAAGGTGCAATTGCATCACTATGAGATGGACCTGCGT                       |
| Strep 2 | <i>Streptococcus</i> spp.       | <b><i>16S rRNA</i></b>                          | AGCTCTGTTGTAAGAGAAGAACGAGTGTGAGAGTGGAAGTTCACACT                         |

|        |                              |                        |                                                                          |
|--------|------------------------------|------------------------|--------------------------------------------------------------------------|
| StAU1  | <i>Staphylococcus aureus</i> | NWMN_<br>2357          | GATCAATCTTTGTCGGTACACGATATTCTTCACGACTAAATAAACGCTCATTCGCGATTTTATAAATGAA   |
| StAU2  | <i>Staphylococcus aureus</i> | NWMN_<br>2357          | TGTTGATAACAATGTTGTATTATCTACTGAAATCTCATTACGTTGCATCGGAAACATTGTGTTCTGTATG   |
| StAU3  | <i>Staphylococcus aureus</i> | NWMN_<br>2357          | TAAAAGCCGTCTTGATAATCTTTAGTAGTACCGAAGCTGGTCATACGAGAGTTATATTTTCCAGCCAAAA   |
| StAU4  | <i>Staphylococcus aureus</i> | NWMN_<br>1707/<br>1708 | TGTTTTGAATTATAAAAACTAAAGTAAAAATGTTGGATGTGAAAGATTGTTGATGAGAATTTTGAGATGT   |
| StAU5  | <i>Staphylococcus aureus</i> | <i>SplB</i>            | TTACCGATGCAACTAAGGAACCATAACAATTCAGTGGTAGCATTGTGGGTGGTACTGGTGTAGTTGTTGGT  |
| StAU6  | <i>Staphylococcus aureus</i> | <i>SplF</i>            | AAATTTAATATAGCATCAGAAGCTAAAGAAAATGAACCTATATCAGTCATTGGTTATCCAAATCCTAATGG  |
| StAU7  | <i>Staphylococcus aureus</i> | <i>SplC</i>            | CGTTGCAACATATCTCGAATTGTAAAGGAGCTTGAAAATGAATAAAAAATATAGTCATTAAAAGCATGGCAG |
| StAU8  | <i>Staphylococcus aureus</i> | <i>SplC</i>            | TGCAGTCGTTGAAGAGACACAACAAATAGCAAATGCAGAGAAGAATGTTACGCAAGTTAAAGATACAAATAT |
| StAUA1 | <i>Staphylococcus aureus</i> | <i>spa</i>             | TGGTTTTATCCAAAGCCTTAAAGATGATCCAAGCCAAAGTGCTAACGTTTTAGGTGAAGCTCAAAAACCTT  |
| StAUA2 | <i>Staphylococcus aureus</i> | <i>spa</i>             | AGCCAAAGTGCTAACGTTTTAGGTGAAGCTCAAAAACCTTAATGACTCTCAAGCTCCAAAAGCTGATGCGC  |
| StAUA3 | <i>Staphylococcus aureus</i> | <i>spa</i>             | TCAACAAAGAACAACAAAATGCTTTCTATGAAATCTTACATTTACCTAACTTAAACGAAGAACAACGCAA   |
| StAUA4 | <i>Staphylococcus aureus</i> | <i>spa</i>             | AGAACAACAAAATGCTTTCTATGAAATTTTACATTTACCTAACTTAACTGAAGAACAACGTAACGGCTTC   |
| StAUB1 | <i>Staphylococcus aureus</i> | <i>spa</i>             | GATCAACGTAATGGTTTTATCCAAAGCCTTAAAGATGATCCAAGCCAAAGTGCTAACGTTTTAGGTGAAG   |
| StAUB2 | <i>Staphylococcus aureus</i> | <i>spa</i>             | AAAGTGCTAACGTTTTAGGTGAAGCTCAAAAACCTTAATGACTCTCAAGCTCCAAAAGCTGATGCGCAACA  |
| StAUB3 | <i>Staphylococcus aureus</i> | <i>spa</i>             | GAATCTCAAGCACCGAAAGCTGATAACAATTTCAACAAAGAACAACAAAATGCTTTCTATGAAATCTTGA   |
| StAUB4 | <i>Staphylococcus aureus</i> | <i>spa</i>             | CGGCTTCATCCAAAGCCTTAAAGACGATCCTTCAGTGAGCAAAGAAATTTTAGCAGAAGCTAAAAAGCTA   |

**Supplementary Material S2, Table S3: Additional Microarray Oligonucleotide Probes used in Study**

| Probe      | Organism                          | Gene            | Sequence                                                                  |
|------------|-----------------------------------|-----------------|---------------------------------------------------------------------------|
| TB_ESAT6_1 | <i>Mycobacterium tuberculosis</i> | <b>ESAT6</b>    | TATCGAGGCCGCGGCAAGCGCAATCCAGGGAAATGTCACGTCCATTTCATTCCTCCTTGACGAGGGGAAG    |
| TB_ESAT6_2 | <i>Mycobacterium tuberculosis</i> | <b>ESAT6</b>    | CGCAGCGGCCTGGGGCGGTAGCGGTTTCGGAGGCGTACCAGGGTGTCCAGCAAAAATGGGACGCCACGGCT   |
| MTB1       | <i>Mycobacterium tuberculosis</i> | <b>IS6110</b>   | GTCAGCACGATTTCGGAGTGGGCAGCGATCAGTGAGGTCGCCCCTCTACTTGGTGTTGGCTGCGCGGAGAC   |
| MTB2       | <i>Mycobacterium tuberculosis</i> | <b>IS6110</b>   | AAGCGCTTGCGGCGGGACAACGCCGAATTGCGAAGGGCGAACGCGATTTTAAAGACCGCGTCGGCTTTCT    |
| MTB3       | <i>Mycobacterium tuberculosis</i> | <b>16S rRNA</b> | AGTGGCGAACGGGTGAGTAACACGTGGGTGATCTGCCCTGCACTTCGGGATAAGCCTGGGAAACTGGGTC    |
| MTB4       | <i>Mycobacterium tuberculosis</i> | <b>16S rRNA</b> | ACCGGATAGGACCACGGGATGCATGTCCTTGTGGTGGAAAGCGCTTTAGCGGTGTGGGATGAGCCCCGCGGCC |
| G6PD1      | <i>Homo sapiens</i>               | <b>G6PD</b>     | CCGTAGGCAGCCTCTCTGCTATAAGAAAAGCAGACGCAGCAGCTGGGACCCCTCCCAACCTCAATGCCCT    |
| PGK1       | <i>Homo sapiens</i>               | <b>PGK</b>      | AAAGTCAAGGCTTATAACAAAAAAGCCCCAGCCCATTCTCCCATTCAGATTCCCACTCCCCAGAGGTG      |
| B2M1       | <i>Homo sapiens</i>               | <b>B2M</b>      | AGGAGGGCTGGCAACTTAGAGGTGGGGAGCAGAGAATTCTCTTATCCAACATCAACATCTTGGTCAGAT     |
| APRR5A     | <i>Arabidopsis thaliana</i>       | <b>APRR5</b>    | AGGAGCCATTGCAGATGTATAAGCTGTGTTGGGATCTCTGAACTGTATATTGTTGATAGGGGTTGGCGTA    |
