# Supplementary material
Source: MDPI journal article supplement (https://www.mdpi.com/2571-5135/7/4/32)
Supplement: s1 [file s1]

Supplementary Material S8; Table S14

| Patient | Sample              | Culture Identification | Supernatant Sample | Total Nucleic Acid in Supernatant Fraction (ng) | Pellet Sample | Total Nucleic Acid in Pellet Fraction (ng) |
|---------|---------------------|------------------------|--------------------|-------------------------------------------------|---------------|--------------------------------------------|
| 1       | Cerebrospinal Fluid | Negative               | CSF1S              | 280                                             | CSF1P         | 2440                                       |
| 2       | Cerebrospinal Fluid | Negative               | CSF2S              | 200                                             | CSF2P         | 320                                        |
| 3       | Cerebrospinal Fluid | Negative               | CSF3S              | 300                                             | CSF3P         | 20                                         |
| 4       | Cerebrospinal Fluid | Negative               | CSF4S              | 300                                             | CSF4P         | 300                                        |
| 5       | Cerebrospinal Fluid | Negative               | CSF5S              | 140                                             | CSF5P         | 0                                          |
| 6       | Cerebrospinal Fluid | Negative               | CSF6S              | 140                                             | CSF6P         | 640                                        |
| 7       | Cerebrospinal Fluid | Negative               | CSF7S              | 540                                             | CSF7P         | 1600                                       |
