# Supplementary material
Source: MDPI journal article supplement (https://www.mdpi.com/2571-5135/7/4/32)

Supplementary Material S10

4

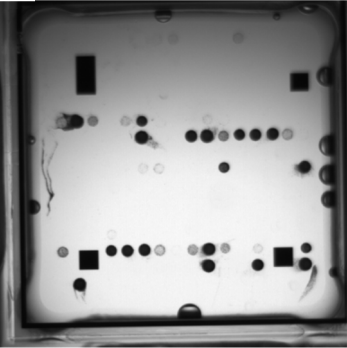

11

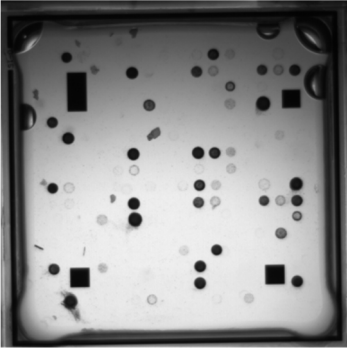

13

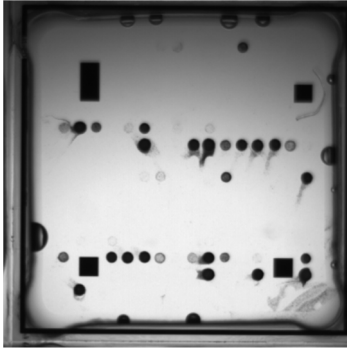

14

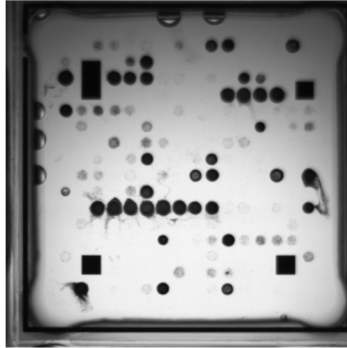

21

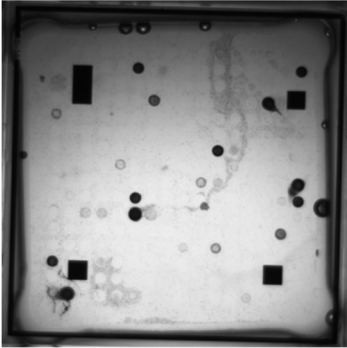

24

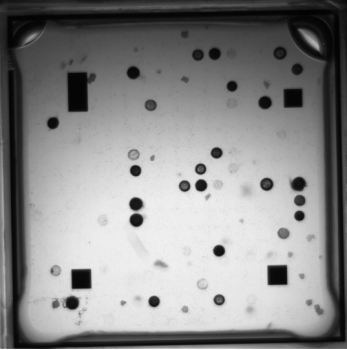

29

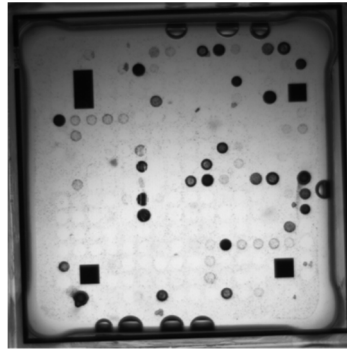

34

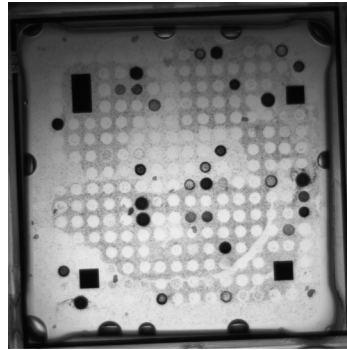

51

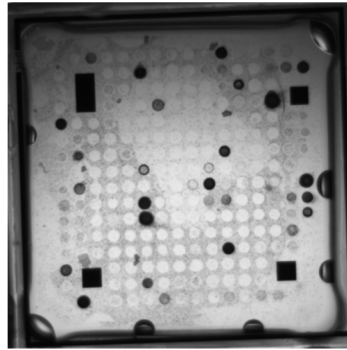

54

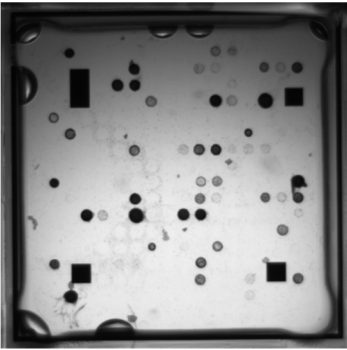

61

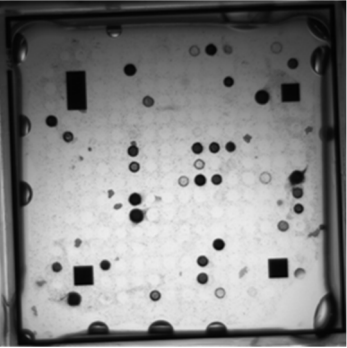

63

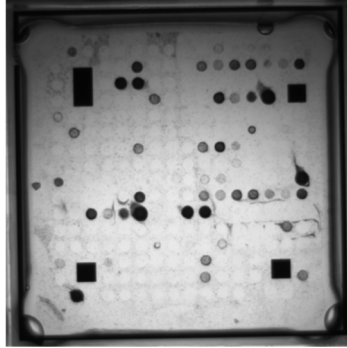

70

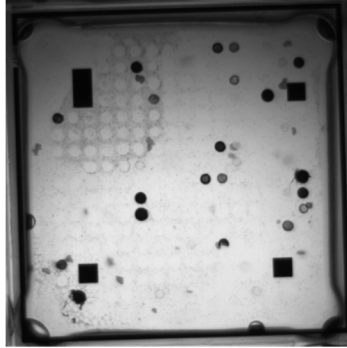

72

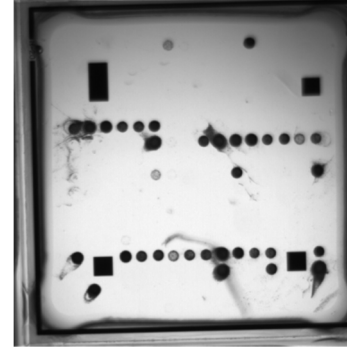

76

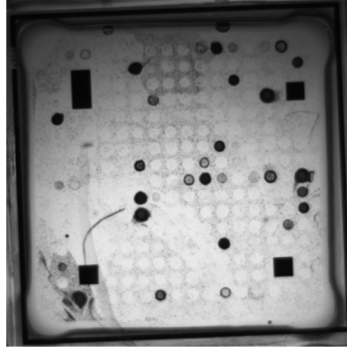

90

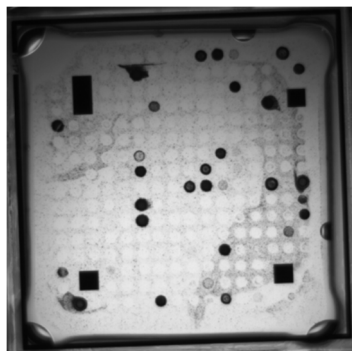

95

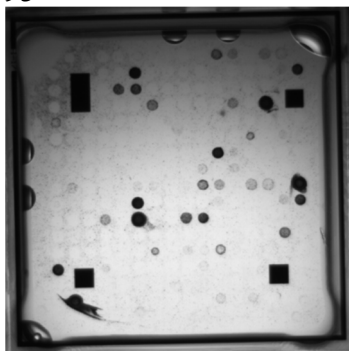

127

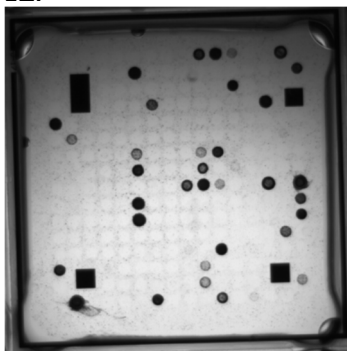

145

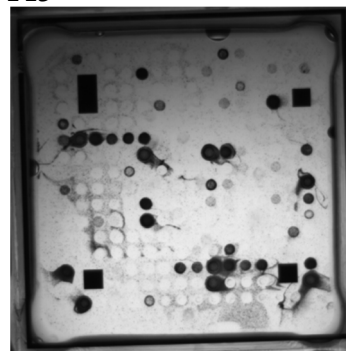

147

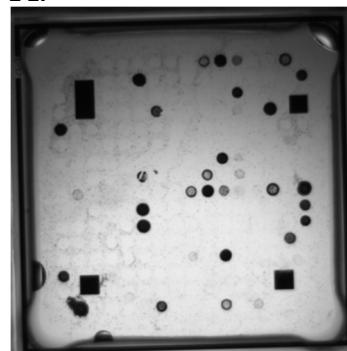

no template control

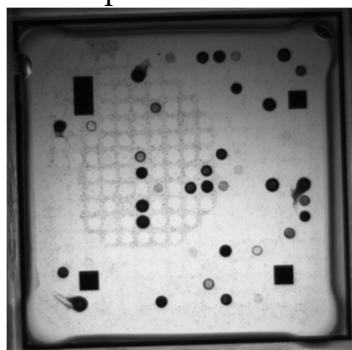

Supplement: s1 [file s1]
